# Supplementary material for: The inhibitory activity of alginate against allergic reactions in an ovalbumin-induced mouse model
Source: Royal Society of Chemistry journal article supplement (doi:10.1039/d0fo00170h), 2020-01-01
Supplement: d0fo00170h1.pdf [file d0fo00170h1.pdf]

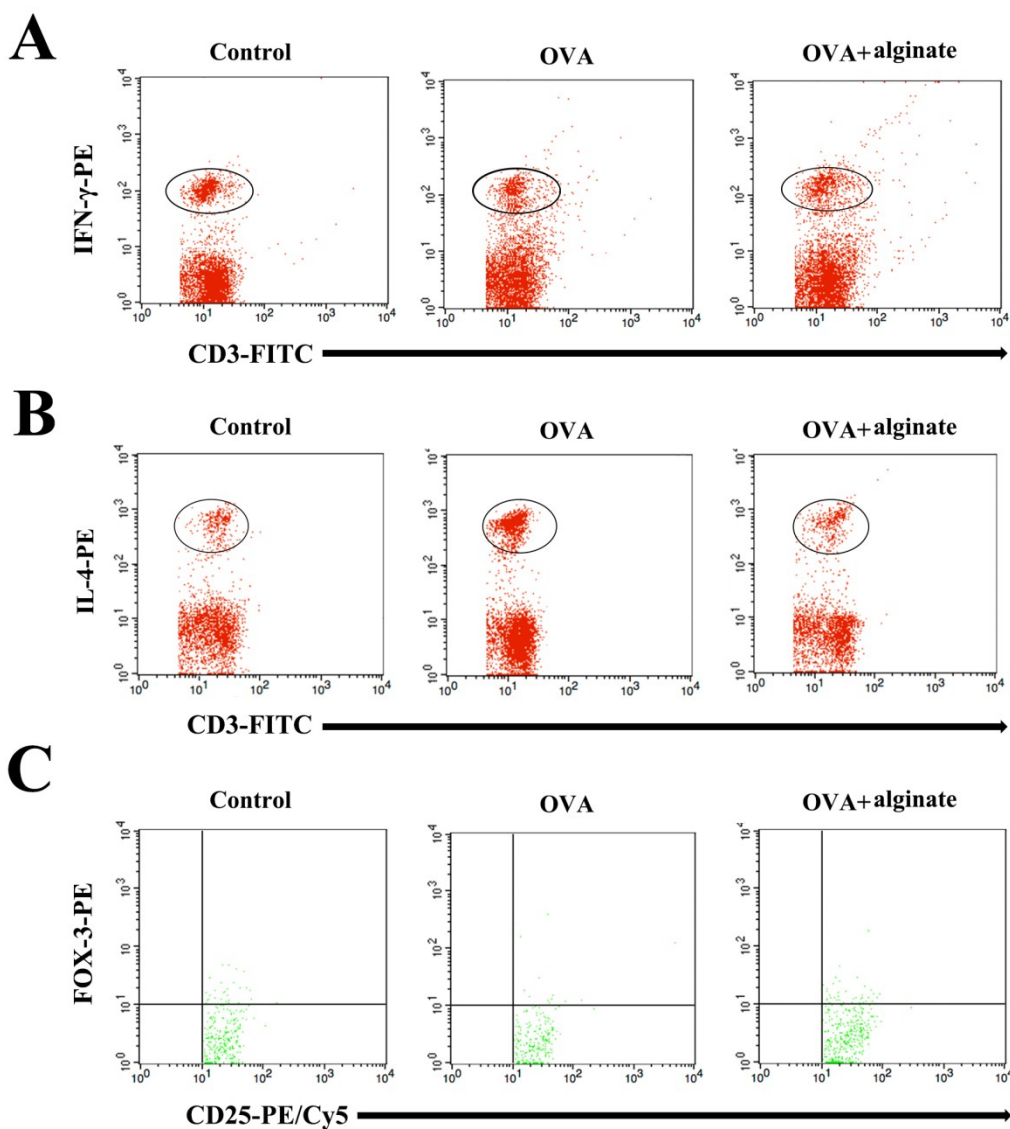

1

2 **Figure S1. Effects of alginate on T cells from the spleens of OVA-sensitized mice.**

3 (A) The scatter plots of Th1 cells (CD3<sup>+</sup>CD8-IFN- $\gamma$ <sup>+</sup>). (B) The scatter plots of Th2

4 cells (CD3<sup>+</sup>CD8-IL-4<sup>+</sup>). (C) The scatter plots of Treg cells (CD4<sup>+</sup>CD25<sup>+</sup>Foxp3<sup>+</sup>).

5
